# Supplementary material
Source: MDPI journal article supplement (https://www.mdpi.com/2072-4292/13/15/2886)
Supplement: s1 [file s1]

## Supplementary Materials

**Table S1.** RTKLib differential GNSS processing parameters used in this study.

| RTKLib Parameters       | <i>Les Pertuis Charentais</i> |
|-------------------------|-------------------------------|
| Frequency               | L1+L2                         |
| Elevation masq          | 10°                           |
| GNSS constellations     | GPS                           |
| Ionospheric correction  | Broadcast                     |
| Tropospheric correction | Saastamoinen model            |
| Ephemeris               | Precise (igs.sp3 files)       |
| Ambiguity resolution    | Fix and Hold                  |
| Dynamic mode            | ON                            |

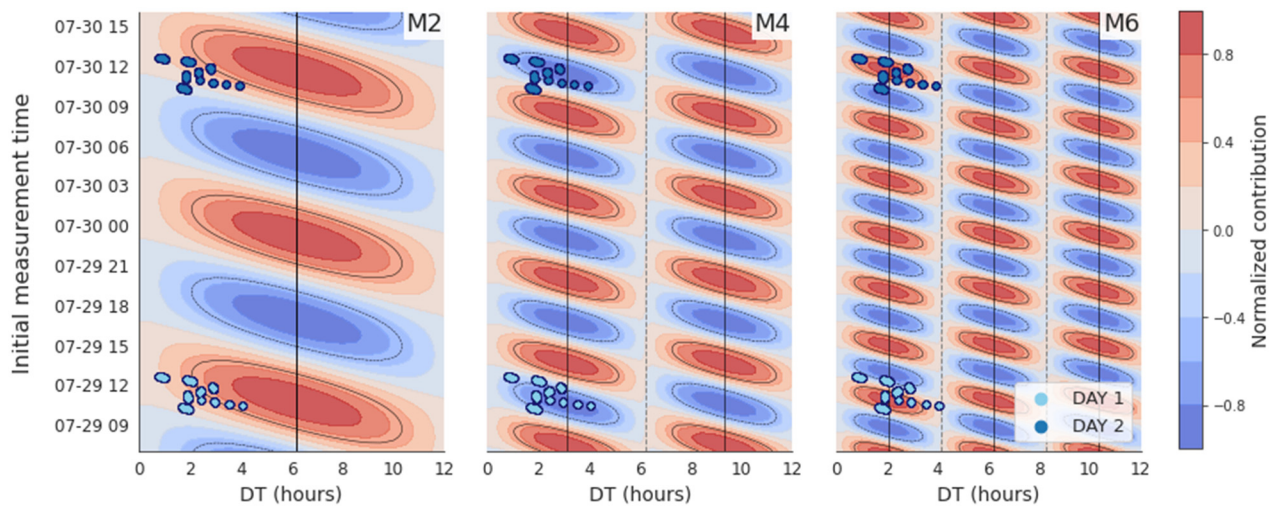

**Figure S1.** Superimposition of pairs of intra-day crossovers with the theoretical residuals computed from a tide reconstruction at Aix Island station, for M2 (left), M4 (middle) and M6 (right). The residual height is normalized by its maximum, within each frequency band. Crossovers measurements of day 1 (light blue dots) and day 2 (dark blue dots) are graphically represented with their initial time and the time interval with the second measurements (dt) as coordinates.

**Table S2.** Prescribed constituents for tidal elevation at model boundary. The 4 dotted constituents are derived from the assimilated solution of Noveltis (BATHY CNES, RegAT\_NEAB\_2019). Red labels correspond to the two constituents for which an empirical bias has been applied on the S+ forcing.

| Long-period | Diurnal | Semi-diurnal | Shallow-water |
|-------------|---------|--------------|---------------|
| SSA         | 2Q1     | EPS2         | M3            |
| MM          | SIG1    | 2N2•         | N4            |
| MSF         | Q1      | MU2•         | MN4           |
| MF          | RHO1    | N2           | M4•           |
|             | O1      | NU2•         | MS4           |
|             | CHI1    | M2           | S4            |
|             | P1      | MKS2         | M6            |
|             | K1      | LDA2         | M8            |
|             | PSI1    | L2           |               |
|             | PHI1    | T2           |               |
|             | THE1    | S2           |               |
|             | J1      | R2           |               |
|             | OO1     | K2           |               |
|             |         |              |               |

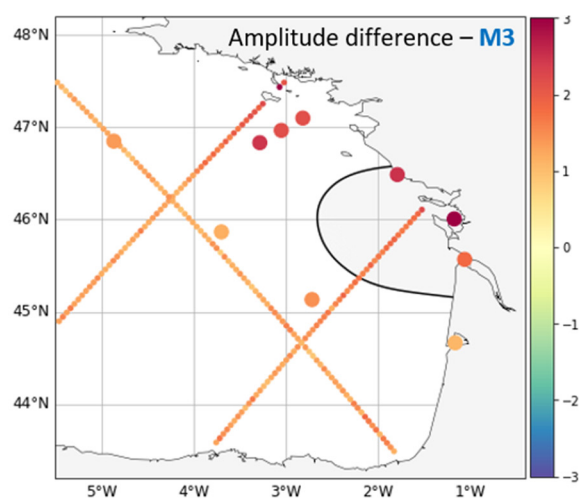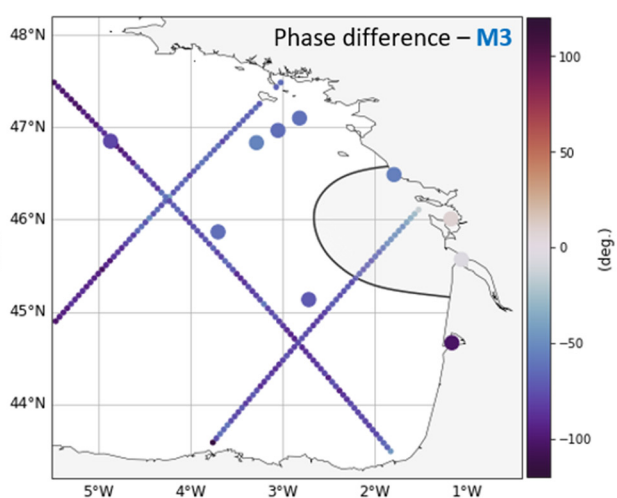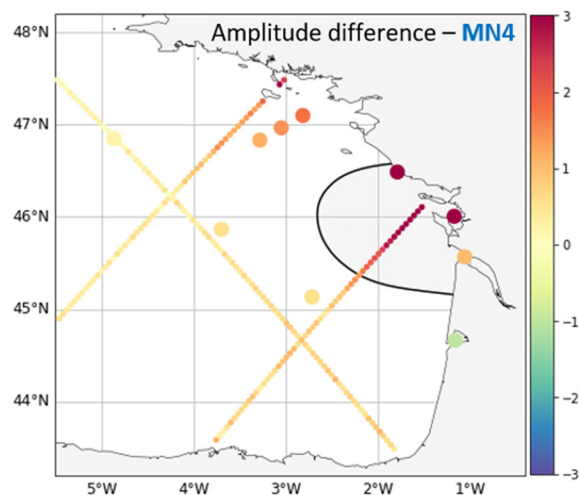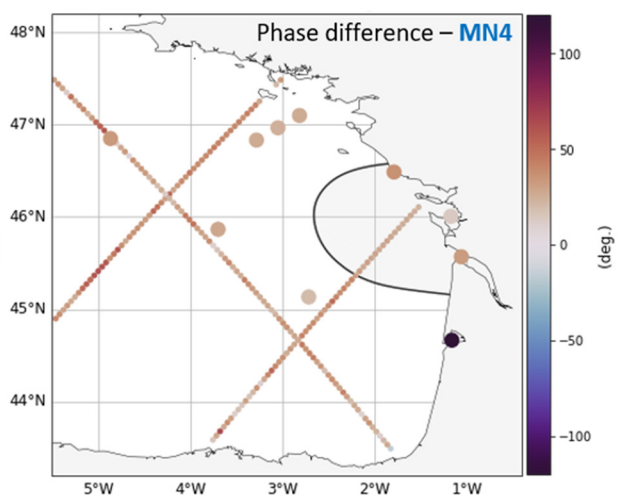

**Figure S2.** Amplitude and phase differences between observations and MAREST-NEA atlas over the Bay of Biscay, for M3 (top panel) and MN4 (bottom panel). Observations are derived from Topex-Jason satellite altimetry (XTRACK product [29]) and tide gauges records [14,16].

**Table S3.** Complex errors computed at the 5 stations used in model validation, for the two model configurations.

|    |                 | K1   | K2   | M2   | M3   | M4   | M6   | MN4  | MS4  | MU2  | N2   | NU2  | O1   | S2   | $\sigma_{station}$ |
|----|-----------------|------|------|------|------|------|------|------|------|------|------|------|------|------|--------------------|
| S  | LSDO            | 0,39 | 0,13 | 1,46 | 1,77 | 0,19 | 0,16 | 3,32 | 0,96 | 0,31 | 0,35 | 0,15 | 0,03 | 1,02 | 4,32               |
|    | LROC            | 0,37 | 0,16 | 1,36 | 2,23 | 0,64 | 1,64 | 5,34 | 1,33 | 0,03 | 0,4  | 0,15 | 0,13 | 1,15 | 6,47               |
|    | AIX             | 0,27 | 0,57 | 2,75 | 2,3  | 2,41 | 2,59 | 6,08 | 0,54 | 0,83 | 1,15 | 0,25 | 0,34 | 1,61 | 8,23               |
|    | BOURC           | 0,56 | 0,49 | 1,15 | 2,03 | 3,11 | 1,26 | 5,42 | 1,17 | 0,97 | 0,75 | 0,33 | 0,43 | 1,14 | 7,14               |
|    | COT             | 0,44 | 0,33 | 1,71 | 1,69 | 0,28 | 0,36 | 2,76 | 0,74 | 0,01 | 0,39 | 0,18 | 0,06 | 0,84 | 3,92               |
|    | $\sigma_{wave}$ | 0,42 | 0,38 | 1,78 | 2,02 | 1,79 | 1,49 | 4,76 | 0,99 | 0,59 | 0,68 | 0,22 | 0,25 | 1,18 | RSS = 6,24         |
| S+ | LSDO            | 0,39 | 0,13 | 1,46 | 0,38 | 0,19 | 0,16 | 0,69 | 0,95 | 0,31 | 0,35 | 0,15 | 0,03 | 1,02 | 2,27               |
|    | LROC            | 0,39 | 0,16 | 1,41 | 0,2  | 0,71 | 1,62 | 1,18 | 1,29 | 0,03 | 0,56 | 0,14 | 0,13 | 1,15 | 3,17               |
|    | AIX             | 0,3  | 0,56 | 2,86 | 0,18 | 2,53 | 2,59 | 1,74 | 0,6  | 0,81 | 1,34 | 0,23 | 0,33 | 1,63 | 5,52               |
|    | BOURC           | 0,6  | 0,53 | 0,95 | 0,14 | 3,34 | 1,37 | 1,41 | 1,22 | 0,93 | 1,16 | 0,24 | 0,38 | 1,06 | 4,65               |
|    | COT             | 0,44 | 0,33 | 1,71 | 0,08 | 0,27 | 0,35 | 1,07 | 0,74 | 0,01 | 0,39 | 0,18 | 0,06 | 0,84 | 2,45               |
|    | $\sigma_{wave}$ | 0,44 | 0,38 | 1,8  | 0,22 | 1,91 | 1,51 | 1,27 | 1    | 0,57 | 0,87 | 0,19 | 0,23 | 1,17 | RSS = 3,83         |

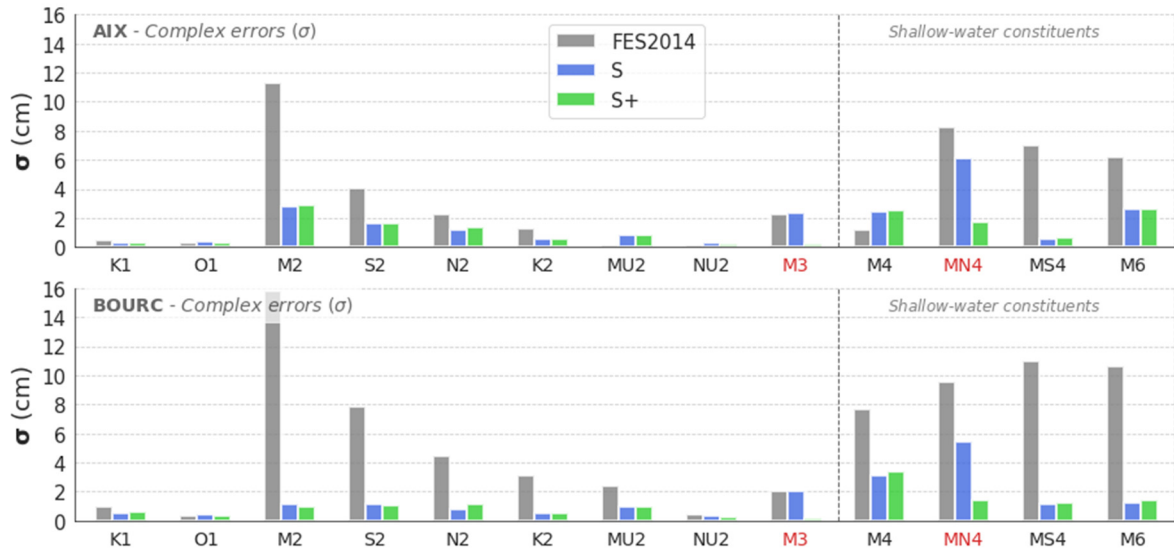

**Figure S3.** Complex errors for the 13 major constituents at AIX (top panel) and BOURC (bottom panel) stations. For each constituent, errors associated to each configuration is represented: FES2014 (grey), S (blue), S+ (green). The last bar chart (right) represents the combined complex error for 13 constituents. Red labels correspond to constituents for which an empirical bias has been applied on the S+ forcing.
